# Supplementary material for: Banana Cultivar Field Screening for Resistance to Fusarium oxysporum f.sp. cubense Tropical Race 4 in the Northern Territory
Source: MDPI journal article supplement (doi:10.3390/jof7080627), 2021-08-01
Supplement: s1 [file s1]

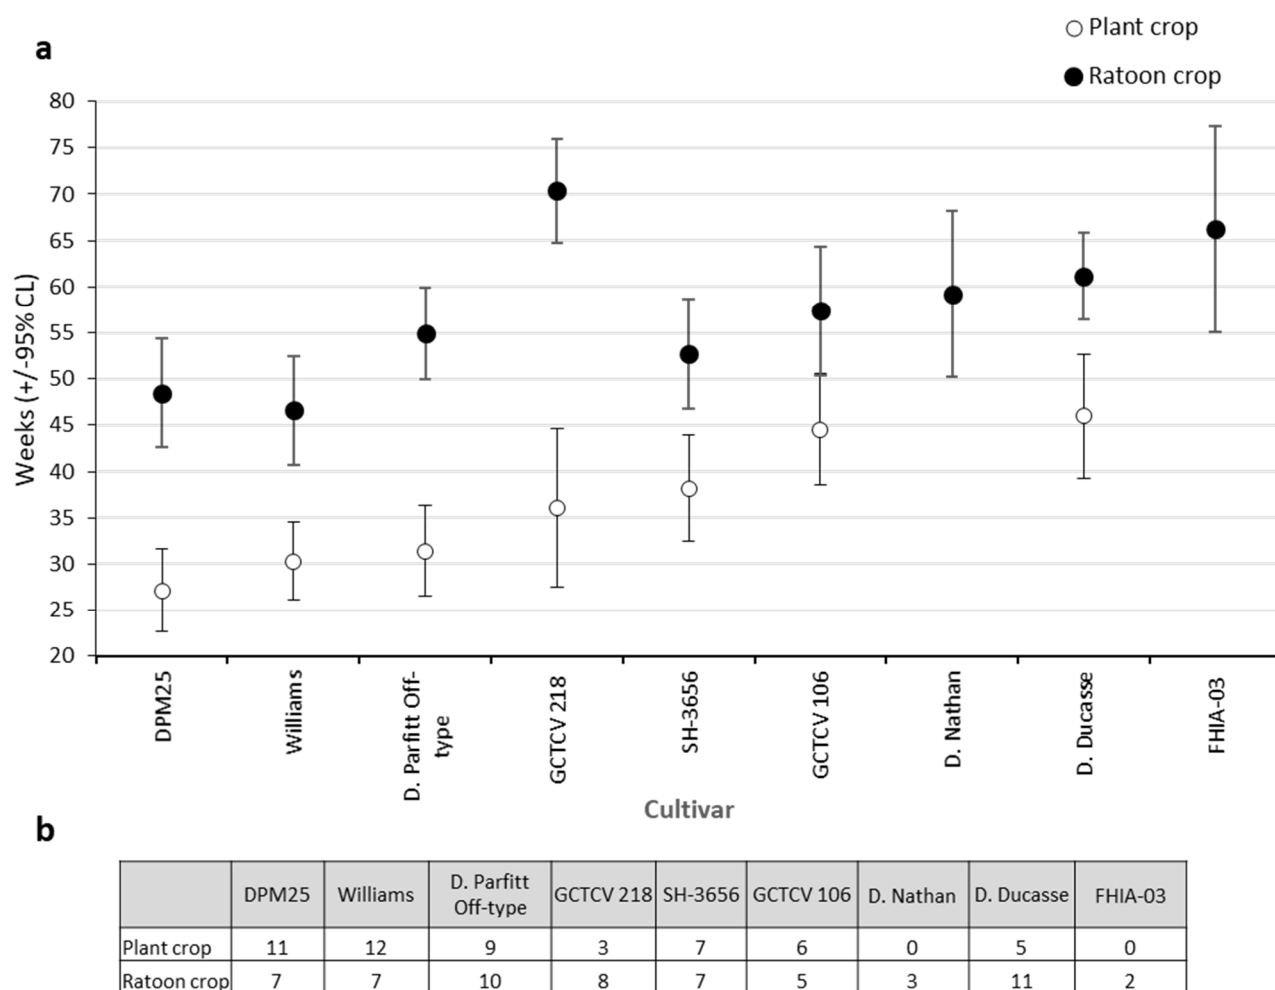

**Figure S1:** Average time to external symptom appearance caused by *Foc* TR4 infection. **a)** Time to external symptom appearance over two crop cycles. **b)** n values for corresponding data points shown in a). Error bars for each cultivar represent the 95% confidence interval for the mean.

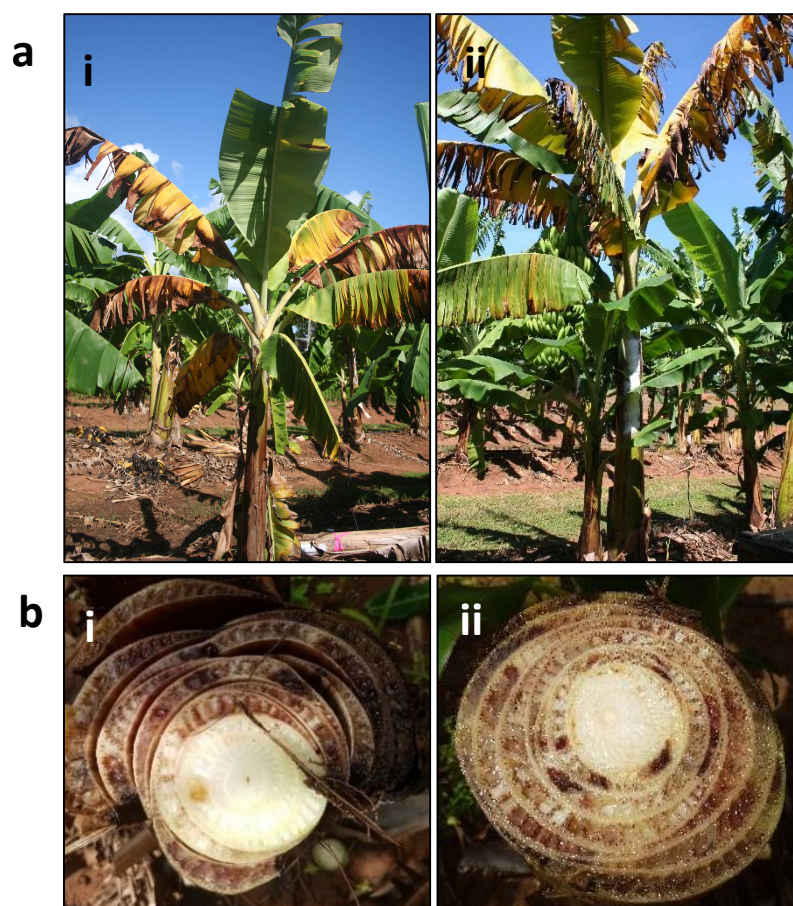

**Figure S2:** Presence of external and internal symptoms on the two most susceptible cultivars i) Williams and ii) DPM25. Symptoms noted in susceptible cultivars included **a)** leaf chlorosis and necrosis and **b)** the presence of internal symptoms within the pseudostems.

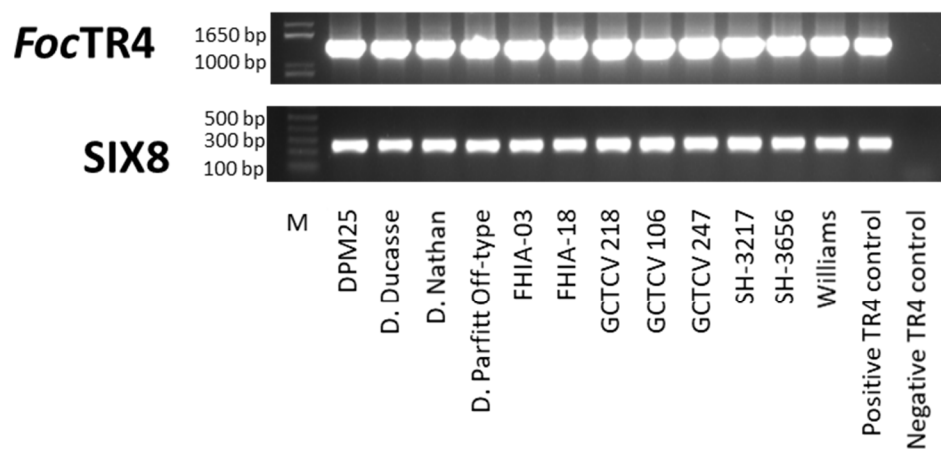

**Figure S3:** PCR amplification of products of pure *Foc* TR4 cultures isolated from pseudostems of cultivars showing signs of infection. M indicates the use of a molecular marker 1Kb DNA plus ladder.
